# Supplementary material
Source: PubMed Central journal article supplement (PMC5726871)

Supplementary Figure 1 : Visual Distribution of CT homologs in the 3 categories.

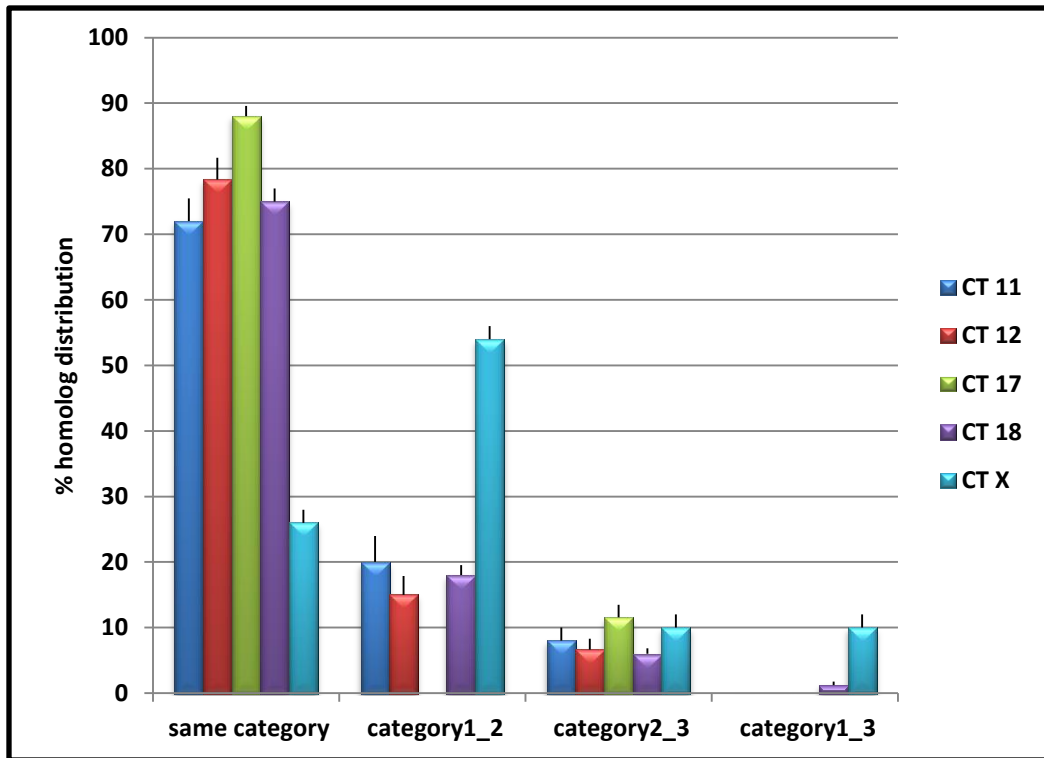

# Supplementary Figure 2 : Linear regression analyses for the entire subset of 12 CT

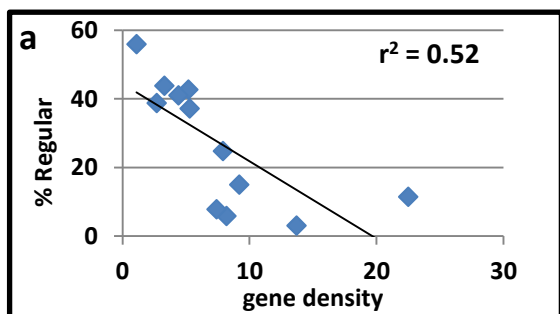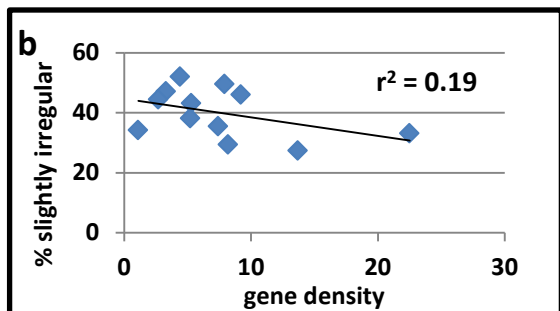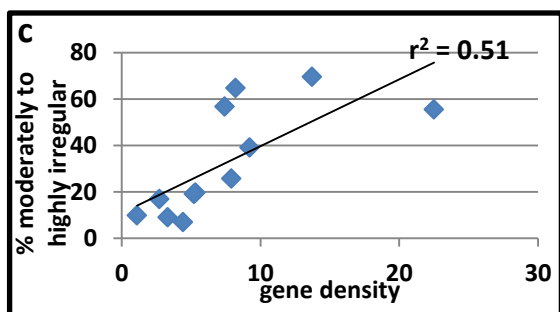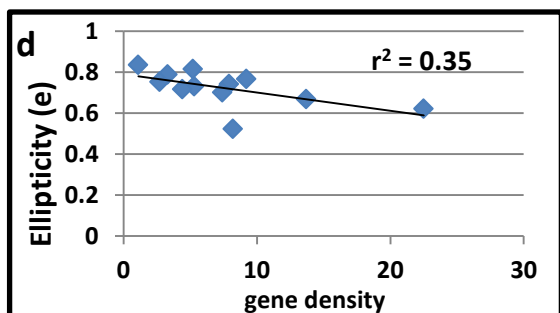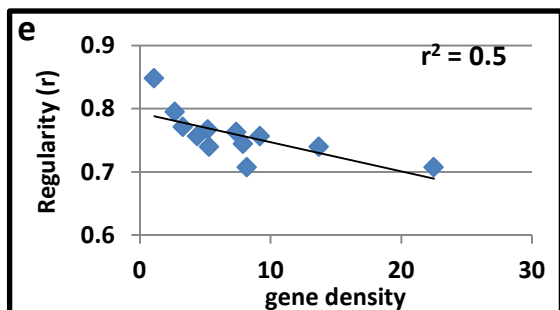

# Supplementary Figure 3: Size has no effect on shape regularity/ ellipticity

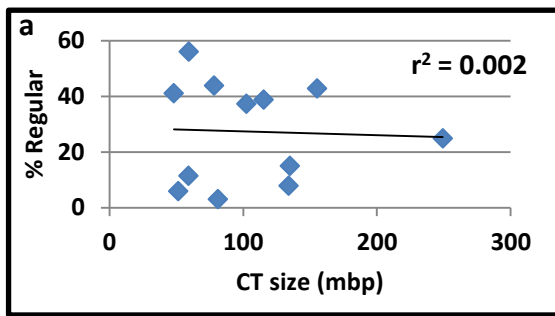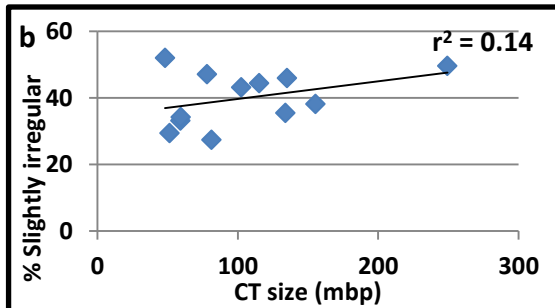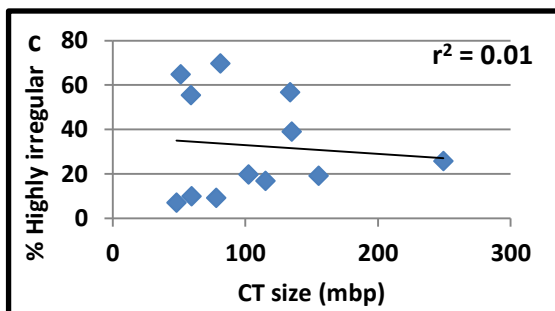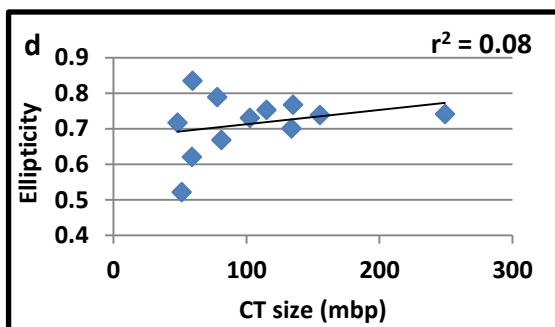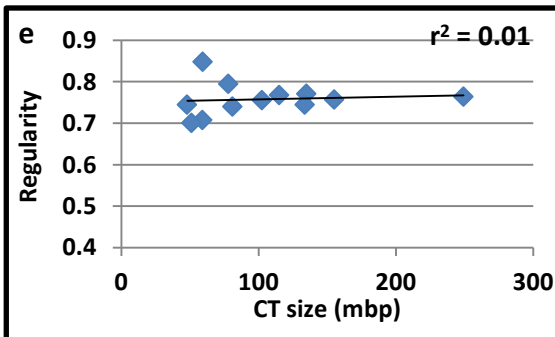

Supplementary Figure 4: Representative images showing differences in CT shapes in G<sub>1</sub> and S phase

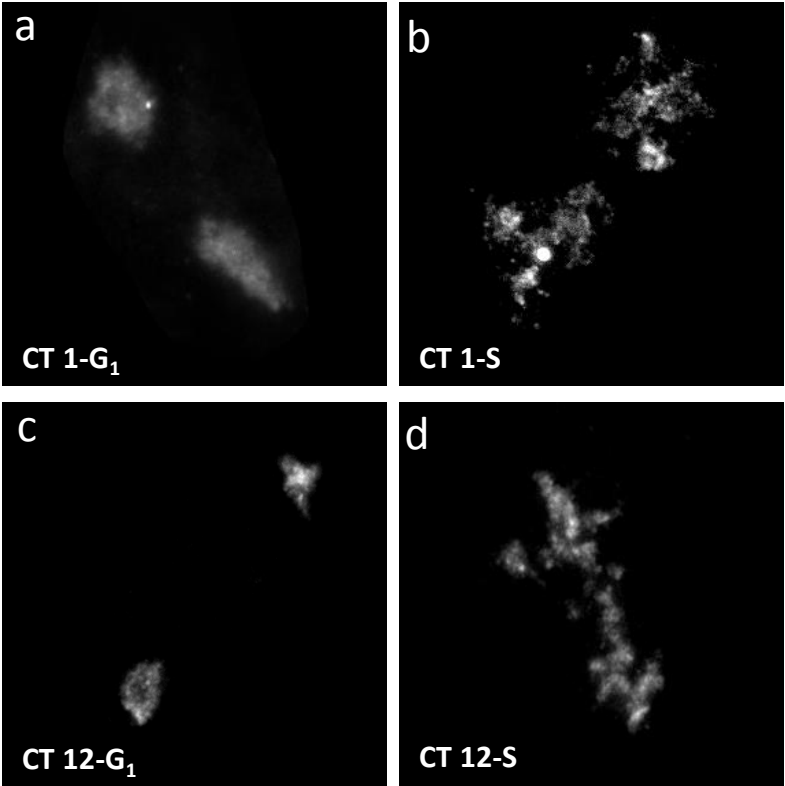

# Supplementary Figure 5: Identification of the X inactive (Xi) CT

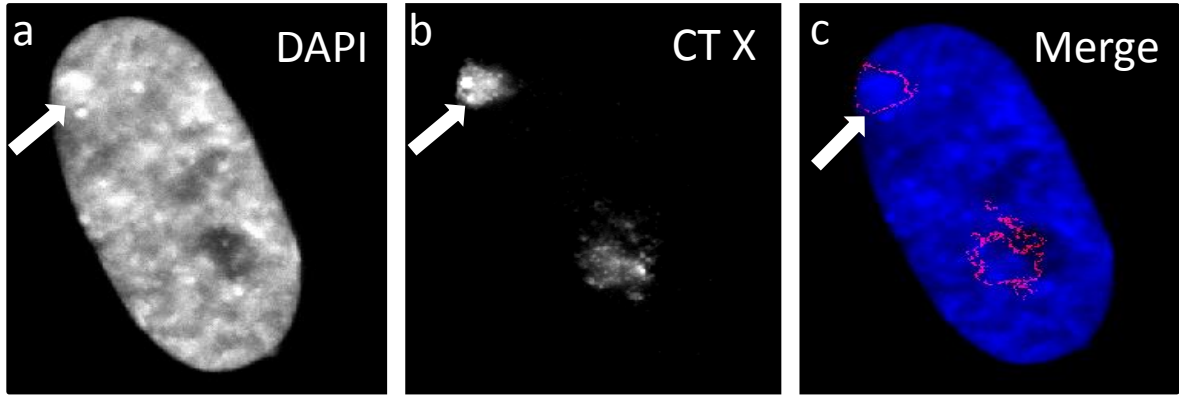

Supplement: NIHMS923885-supplement-supplement.pdf [file NIHMS923885-supplement-supplement.pdf]
